# Supplementary material for: A general strategy for the experimental study of the thermochemistry of protic ionic liquids: enthalpy of formation and vaporisation of 1-methylimidazolium ethanoate
Source: Royal Society of Chemistry journal article supplement (doi:10.1039/c2cp40213k), 2012-01-01
Supplement: c2cp40213k.pdf [file c2cp40213k.pdf]

# **A general strategy for the experimental study of the thermochemistry of protic ionic liquids: Enthalpy of formation and vaporisation of 1-methylimidazolium ethanoate**

**Joana Vitorino,<sup>a</sup> Carlos E. S. Bernardes,<sup>a,b</sup> Manuel E. Minas da Piedade,<sup>a,\*</sup>**

<sup>a</sup> *Departamento de Química e Bioquímica, Faculdade de Ciências, Universidade de Lisboa, 1749-016 Lisboa, Portugal; E-mail: memp@fc.ul.pt.*

<sup>b</sup> *Centro de Química Estrutural, Complexo Interdisciplinar, Instituto Superior Técnico da Universidade Técnica de Lisboa, 1049-001 Lisboa, Portugal.*

## Supplementary Information

### 1. Enthalpy of vaporisation of [Hmim][O<sub>2</sub>CCH<sub>3</sub>] by drop-vaporisation Calvet microcalorimetry.

The standard specific enthalpy of vaporisation of [Hmim][O<sub>2</sub>CCH<sub>3</sub>],  $\Delta_{\text{vap}}h^\circ$ , at 298.15 K, was derived from:

$$\Delta_{\text{vap}}h^\circ = \frac{1}{m} \left[ \frac{(A - A_b)}{\varepsilon} - \frac{m_{\text{H}_2\text{O}}}{M_{\text{H}_2\text{O}}} \Delta_{\text{vap}}H_m^\circ(\text{H}_2\text{O}) \right] \quad (\text{S1})$$

where  $m$  is the mass of [Hmim][O<sub>2</sub>CCH<sub>3</sub>] after correction for the water content;  $m_{\text{H}_2\text{O}}$  is the mass of water given by Karl Fisher titration;  $M_{\text{H}_2\text{O}} = 18.0153 \text{ g}\cdot\text{mol}^{-1}$  is the molar mass of water;  $\Delta_{\text{vap}}H_m^\circ(\text{H}_2\text{O}) = 44.004 \pm 0.002 \text{ kJ}\cdot\text{mol}^{-1}$  is the standard molar enthalpy of vaporisation of water;<sup>1</sup>  $A$  is the area of the measurement curve corresponding to the over-all experiment;  $A_b$  is the area of the background contribution for the observed process due to dropping and evacuation of the cell; and  $\varepsilon$  is the energy equivalent of the calorimeter obtained by electrical calibration. The detailed results of the calorimetric experiments on samples 1 to 3 are given in Tables S1-S3 where  $T$  is the temperature of the calorimetric cell and  $m_s$  is the mass of sample ([Hmim][O<sub>2</sub>CCH<sub>3</sub>] + H<sub>2</sub>O) used in the experiment.

**TABLE S1: Results of the vaporisation enthalpy measurements on 1-methylimidazolium ethanoate, by drop-vaporisation Calvet microcalorimetry (Sample 1)**

| $T/\text{K}$ | $m_s/\text{mg}$ | $m_{\text{H}_2\text{O}}/\mu\text{g}$ | $m/\text{mg}$ | $A$     | $\Delta_{\text{vap}}h^\circ/\text{J}\cdot\text{g}^{-1}$ |
|--------------|-----------------|--------------------------------------|---------------|---------|---------------------------------------------------------|
| 297.96       | 9.72            | 5                                    | 9.72          | 521.915 | 830.864                                                 |
| 297.95       | 10.12           | 5                                    | 10.12         | 538.315 | 823.320                                                 |
| 297.93       | 12.23           | 6                                    | 12.22         | 638.981 | 810.311                                                 |
| 297.90       | 9.91            | 5                                    | 9.91          | 523.286 | 817.053                                                 |
| 297.89       | 6.66            | 3                                    | 6.66          | 355.183 | 822.072                                                 |

Water content from Karl Fisher titration: 465 ppm

$$\langle \Delta_{\text{vap}}h^\circ \rangle = 824.01 \pm 3.46 \text{ J}\cdot\text{g}^{-1}$$

$$\langle \varepsilon \rangle = 63.805 \pm 0.138 \text{ mV}\cdot\text{W}^{-1}$$

$$A_b = 3.850 \text{ mV}\cdot\text{s}$$

$$\sigma(\text{over-all}) = 3.89 \text{ J}\cdot\text{g}^{-1}$$

$$\Delta_{\text{vap}}H_m^\circ = 117.14 \pm 1.10 \text{ kJ}\cdot\text{mol}^{-1}$$

**TABLE S2: Results of the vaporisation enthalpy measurements on 1-methylimidazolium ethanoate, by drop-vaporisation Calvet microcalorimetry (Sample 2)**

| $T/K$  | $m_s/mg$ | $m_{H_2O}/\mu g$ | $m/mg$ | $A$      | $\Delta_{vap} h^\circ / J \cdot g^{-1}$ |
|--------|----------|------------------|--------|----------|-----------------------------------------|
| 298.11 | 14.00    | 32               | 13.97  | 735.464  | 812.241                                 |
| 298.11 | 14.53    | 33               | 14.50  | 778.122  | 828.345                                 |
| 298.07 | 8.50     | 19               | 8.48   | 450.981  | 817.571                                 |
| 298.08 | 11.44    | 26               | 11.41  | 612.997  | 827.958                                 |
| 298.08 | 19.32    | 44               | 19.28  | 1024.198 | 821.058                                 |
| 298.08 | 15.35    | 35               | 15.32  | 817.184  | 823.564                                 |
| 298.08 | 13.58    | 31               | 13.55  | 714.775  | 813.727                                 |

Water content from Karl Fisher titration: 2271 ppm

$$\langle \Delta_{vap} h^\circ \rangle = 820.64 \pm 2.44 \text{ J} \cdot g^{-1}$$

$$\langle \varepsilon \rangle = 63.988 \pm 0.096 \text{ mV} \cdot W^{-1}$$

$$A_b = 4.404 \text{ mV} \cdot s$$

$$\sigma(\text{over-all}) = 2.73 \text{ J} \cdot g^{-1}$$

$$\Delta_{vap} H_m^\circ = 116.66 \pm 0.78 \text{ kJ} \cdot \text{mol}^{-1}$$

**TABLE S3: Results of the vaporisation enthalpy measurements on 1-methylimidazolium ethanoate, by drop-vaporisation Calvet microcalorimetry (Sample 3)**

| $T/K$  | $m_s/mg$ | $m_{H_2O}/\mu g$ | $m/mg$ | $A$     | $\Delta_{vap} h^\circ / J \cdot g^{-1}$ |
|--------|----------|------------------|--------|---------|-----------------------------------------|
| 298.09 | 12.39    | 27               | 12.36  | 670.089 | 836.327                                 |
| 298.09 | 16.20    | 35               | 16.17  | 877.85  | 838.899                                 |
| 298.13 | 13.90    | 30               | 13.87  | 745.148 | 829.344                                 |
| 298.12 | 7.34     | 16               | 7.32   | 398.003 | 834.973                                 |
| 298.12 | 17.99    | 39               | 17.95  | 962.823 | 829.136                                 |
| 298.12 | 10.65    | 23               | 10.63  | 578.432 | 838.664                                 |
| 298.09 | 6.62     | 14               | 6.61   | 363.318 | 843.419                                 |
| 298.09 | 15.39    | 33               | 15.36  | 809.422 | 813.802                                 |
| 298.12 | 12.24    | 27               | 12.21  | 652.894 | 824.652                                 |

Water content from Karl Fisher titration: 2167 ppm

$$\langle \Delta_{vap} h^\circ \rangle = 832.14 \pm 3.01 \text{ J} \cdot g^{-1}$$

$$\langle \varepsilon \rangle = 63.988 \pm 0.096 \text{ mV} \cdot W^{-1}$$

$$A_b = 4.404 \text{ mV} \cdot s$$

$$\sigma(\text{over-all}) = 3.26 \text{ J} \cdot g^{-1}$$

$$\Delta_{vap} H_m^\circ = 118.29 \pm 0.93 \text{ kJ} \cdot \text{mol}^{-1}$$

**2. Solution calorimetry.** The results of the solution calorimetry determinations summarized in the thermodynamic cycle in Scheme 1 of the main text correspond to the following solution processes:

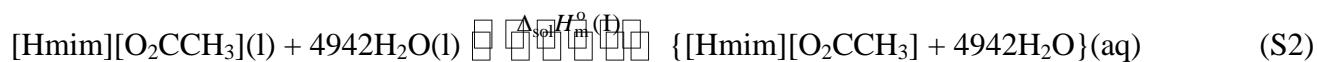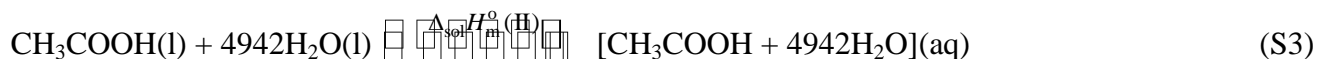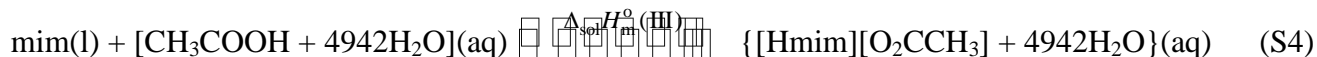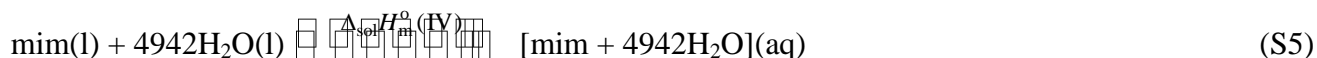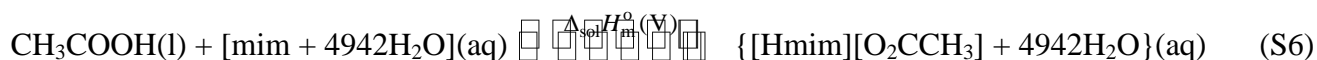

The value  $\Delta_{\text{sol}}H_{\text{m}}^{\circ}(\text{II}) = -(1.25 \pm 0.80) \text{ kJ} \cdot \text{mol}^{-1}$  was taken from the NBS tables.<sup>2</sup> The remaining enthalpy of solution data were based on the results given in Tables S4 to S7. Here,  $m$  represents the mass of compound under study (ionic liquid, 1-methylimidazole or ethanoic acid) obtained from  $m_s$  the mass of sample and the corresponding water content  $m_{\text{H}_2\text{O}}$  calculated from the results of Karl Fisher titration;  $n$  is the amount of substance of water per 1 mol the dissolved compound in the final calorimetric solution;  $\varepsilon$  is the energy equivalent of the calorimeter determined by electrical calibration; and  $\Delta T_{\text{ad}}$  represents the adiabatic temperature change, which corresponds to the temperature variation that would have been observed in the experiments if the heat dissipation occurred under strict adiabatic conditions.

The calibration constant,  $\varepsilon$ , was obtained from:

$$\varepsilon = \frac{VIt}{\Delta T_{\text{ad}}} \quad (\text{S7})$$

where  $I$  is the current intensity that passed through the 50  $\Omega$  resistance as a result of the application of a potential difference  $V$  during the time period  $t$ . The standard molar enthalpy of the solution process,  $\Delta_{\text{sol}}H_{\text{m}}^{\circ}$ , was calculated from:

$$\Delta_{\text{sol}}H_{\text{m}}^{\circ} = \frac{M \varepsilon \Delta T_{\text{ad}}}{m} \quad (\text{S8})$$

where  $m$  and  $M$  are the mass and the molar mass of the compound under study, respectively.

**TABLE S4: Standard molar enthalpy of solution of 1-methylimidazolium ethanoate in water, at 298.15 K**

| Sample | $m_s/\text{mg}$ | $m_{\text{H}_2\text{O}}/\mu\text{g}$ | $m/\text{mg}$ | $n$  | $\varepsilon/\text{J}\cdot\text{K}^{-1}$ | $\Delta T_{\text{ad}}/\text{mK}$ | $-\Delta_{\text{sol}}H_{\text{m}}^{\circ}(\text{I})/\text{kJ}\cdot\text{mol}^{-1}$ |
|--------|-----------------|--------------------------------------|---------------|------|------------------------------------------|----------------------------------|------------------------------------------------------------------------------------|
| 1      | 157.53          | 73                                   | 157.46        | 4997 | 447.500                                  | 69.548                           | 28.098                                                                             |
|        | 161.14          | 75                                   | 161.07        | 4885 | 447.410                                  | 71.075                           | 28.066                                                                             |
|        | 141.70          | 66                                   | 141.63        | 5555 | 447.238                                  | 62.526                           | 28.067                                                                             |
|        | 167.58          | 78                                   | 167.50        | 4697 | 447.484                                  | 73.996                           | 28.102                                                                             |
|        | 163.93          | 76                                   | 163.85        | 4802 | 446.984                                  | 72.399                           | 28.076                                                                             |
|        | 162.71          | 76                                   | 162.63        | 4837 | 447.734                                  | 71.851                           | 28.119                                                                             |
| 2      | 161.14          | 366                                  | 160.77        | 4893 | 445.459                                  | 71.044                           | 27.982                                                                             |
|        | 162.02          | 368                                  | 161.65        | 4867 | 447.234                                  | 71.247                           | 28.021                                                                             |

Water content from Karl Fisher titration: 465 ppm (sample 1); 2271 ppm (sample 2)

$$\langle n \rangle = 4942$$

$$\langle \Delta_{\text{sol}}H_{\text{m}}^{\circ}(\text{I}) \rangle = -(28.07 \pm 0.03) \text{ kJ}\cdot\text{mol}^{-1}$$

The results in Table S4 do not show any concentration dependence in the range  $4697 < n < 5555$ . The mean value of  $\Delta_{\text{sol}}H_{\text{m}}^{\circ}(\text{I})$  was, therefore, also assigned to the mean value of  $n$  in that table, namely  $n = 4942$ .

**TABLE S5: Standard molar enthalpy of solution of 1-methylimidazole in  $\text{CH}_3\text{COOH}\cdot n\text{H}_2\text{O}$ , at 298.15 K.**

| $m_s/\text{mg}$ | $m_{\text{H}_2\text{O}}/\mu\text{g}$ | $m/\text{mg}$ | $n$  | $\varepsilon/\text{J}\cdot\text{K}^{-1}$ | $\Delta T_{\text{ad}}/\text{mK}$ | $-\Delta_{\text{sol}}H_{\text{m}}^{\circ}(\text{III})/\text{kJ}\cdot\text{mol}^{-1}$ |
|-----------------|--------------------------------------|---------------|------|------------------------------------------|----------------------------------|--------------------------------------------------------------------------------------|
| 93.76           | 1                                    | 93.76         | 4846 | 446.485                                  | 101.771                          | 39.791                                                                               |
| 92.30           | 1                                    | 92.30         | 4923 | 447.115                                  | 100.728                          | 40.062                                                                               |
| 92.95           | 1                                    | 92.95         | 4889 | 447.567                                  | 101.179                          | 40.001                                                                               |
| 93.42           | 1                                    | 93.42         | 4864 | 448.028                                  | 101.084                          | 39.803                                                                               |
| 92.64           | 1                                    | 92.64         | 4905 | 447.386                                  | 101.023                          | 40.056                                                                               |
| 84.66           | 1                                    | 84.66         | 5368 | 446.735                                  | 94.396                           | 40.897                                                                               |
| 86.11           | 1                                    | 86.11         | 5277 | 447.822                                  | 96.136                           | 41.049                                                                               |
| 89.90           | 1                                    | 89.90         | 5055 | 448.071                                  | 98.604                           | 40.351                                                                               |
| 85.47           | 1                                    | 85.47         | 5316 | 447.148                                  | 95.230                           | 40.905                                                                               |
| 89.10           | 1                                    | 89.10         | 5100 | 447.513                                  | 98.163                           | 40.480                                                                               |

Water content from Karl Fisher titration: 12 ppm

$$\Delta_{\text{sol}}H_{\text{m}}^{\circ}(\text{III}) = -(2.297 \pm 0.175) \times 10^{-3} n - (28.73 \pm 0.88)$$

$$\langle \Delta_{\text{sol}}H_{\text{m}}^{\circ}(\text{III}) \rangle = -(40.08 \pm 0.16) \text{ kJ}\cdot\text{mol}^{-1} \text{ for } n = 4942$$

**TABLE S6: Standard molar enthalpy of solution of 1-methylimidazole in water, at 298.15 K**

| $m_s/\text{mg}$ | $m_{\text{H}_2\text{O}}/\mu\text{g}$ | $m/\text{mg}$ | $n$  | $\varepsilon/\text{J}\cdot\text{K}^{-1}$ | $\Delta T_{\text{ad}}/\text{mK}$ | $-\Delta_{\text{sol}}H_{\text{m}}^{\circ}(\text{IV})/\text{kJ}\cdot\text{mol}^{-1}$ |
|-----------------|--------------------------------------|---------------|------|------------------------------------------|----------------------------------|-------------------------------------------------------------------------------------|
| 88.49           | 1                                    | 88.49         | 5135 | 447.071                                  | 24.015                           | 9.962                                                                               |
| 87.67           | 1                                    | 87.67         | 5183 | 447.005                                  | 22.990                           | 9.624                                                                               |
| 93.39           | 1                                    | 93.39         | 4865 | 447.828                                  | 24.542                           | 9.662                                                                               |
| 86.14           | 1                                    | 86.14         | 5275 | 446.758                                  | 22.379                           | 9.530                                                                               |
| 96.12           | 1                                    | 96.12         | 4727 | 447.721                                  | 25.284                           | 9.670                                                                               |
| 90.66           | 1                                    | 90.66         | 5012 | 446.854                                  | 23.119                           | 9.356                                                                               |

Water content from Karl Fisher titration: 12 ppm

$$\langle \Delta_{\text{sol}}H_{\text{m}}^{\circ}(\text{IV}) \rangle = -(9.63 \pm 0.16) \text{ kJ}\cdot\text{mol}^{-1}$$

The results do not show a concentration dependence in the range  $4727 < n < 5275$ . The mean value of  $\Delta_{\text{sol}}H_{\text{m}}^{\circ}(\text{IV})$  was, therefore, also assigned to  $n = 4942$ .

**TABLE S7: Standard molar enthalpy of solution of  $\text{CH}_3\text{COOH}$  in 1-methylimidazole- $n\text{H}_2\text{O}$ , at 298.15 K**

| $m_s/\text{mg}$ | $m_{\text{H}_2\text{O}}/\mu\text{g}$ | $m/\text{mg}$ | $n$  | $\varepsilon/\text{J}\cdot\text{K}^{-1}$ | $\Delta T_{\text{ad}}/\text{mK}$ | $-\Delta_{\text{sol}}H_{\text{m}}^{\circ}(\text{V})/\text{kJ}\cdot\text{mol}^{-1}$ |
|-----------------|--------------------------------------|---------------|------|------------------------------------------|----------------------------------|------------------------------------------------------------------------------------|
| 60.01           | 13                                   | 60.00         | 5539 | 447.035                                  | 73.703                           | 32.978                                                                             |
| 60.53           | 13                                   | 60.52         | 5492 | 446.638                                  | 74.423                           | 32.985                                                                             |
| 63.89           | 14                                   | 63.88         | 5203 | 447.853                                  | 77.017                           | 32.427                                                                             |
| 95.78           | 21                                   | 95.76         | 3471 | 447.556                                  | 88.761                           | 24.913                                                                             |
| 87.99           | 20                                   | 87.97         | 3778 | 447.142                                  | 87.025                           | 26.563                                                                             |
| 92.53           | 21                                   | 92.51         | 3593 | 447.743                                  | 88.027                           | 25.585                                                                             |
| 79.08           | 18                                   | 79.06         | 4204 | 447.414                                  | 85.642                           | 29.104                                                                             |
| 71.96           | 16                                   | 71.94         | 4620 | 446.727                                  | 82.827                           | 30.885                                                                             |
| 72.27           | 16                                   | 72.25         | 4600 | 446.109                                  | 77.884                           | 28.877                                                                             |

Water content from Karl Fisher titration: 223 ppm

$$\Delta_{\text{sol}}H_{\text{m}}^{\circ}(\text{V}) = -(3.892 \pm 0.304) \times 10^{-3}n - (11.86 \pm 1.39)$$

$$\langle \Delta_{\text{sol}}H_{\text{m}}^{\circ}(\text{V}) \rangle = -(31.09 \pm 1.36) \text{ kJ}\cdot\text{mol}^{-1} \text{ for } n = 4942$$

### 3. Enthalpies of formation and vaporisation of 1-methylimidazole.

(a) **Calculation of  $\Delta_f H_m^\circ$  (mim, l) from published data.** The standard specific internal energies of combustion of 1-methylimidazole,  $\Delta_c u^\circ$ , calculated in this work from the results of previously reported combustion calorimetry experiments<sup>3-5</sup> are indicated in Table S8, with the corresponding number of determinations given in parenthesis. The  $\Delta_c u^\circ$  value corresponding to the first entry in Table S8 was based on the experimentally determined mass of CO<sub>2</sub> formed in the combustion process. The remaining values were based on the mass of ionic liquid burned after correction for the water content of the sample. These results lead to the standard molar enthalpies of combustion,  $\Delta_c H_m^\circ$ , that are also given in Table S8. The uncertainties assigned to  $\Delta_c u^\circ$  represent standard deviations of the mean and those of  $\Delta_c H_m^\circ$  represent twice the overall standard deviations of the mean, including the contributions from the calibration with benzoic acid and from the combustion of combustion aids.<sup>6,7</sup> The  $\Delta_c H_m^\circ$  values correspond to reaction:

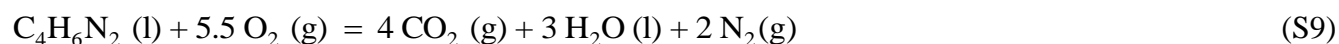

and, in conjunction with  $\Delta_f H_m^\circ(\text{CO}_2, \text{g}) = -393.51 \pm 0.13 \text{ kJ}\cdot\text{mol}^{-1}$  and  $\Delta_f H_m^\circ(\text{H}_2\text{O}, \text{l}) = -285.830 \pm 0.040 \text{ kJ}\cdot\text{mol}^{-1}$  lead to the standard molar enthalpies of formation of liquid 1-methylimidazole indicated in Table S8. The weighted mean,<sup>8</sup> of these three results,  $\Delta_f H_m^\circ(\text{mim}, \text{l}) = 71.7 \pm 1.0 \text{ kJ}\cdot\text{mol}^{-1}$ , was, therefore, selected in the present work.

**TABLE S8: Standard molar enthalpies of combustion and formation of liquid 1-methylimidazole, at 298.15 K**

| $-\Delta_c u^\circ / \text{J}\cdot\text{g}^{-1}{}^a$ | $-\Delta_c H_m^\circ / \text{kJ}\cdot\text{mol}^{-1}$ | $\Delta_f H_m^\circ / \text{kJ}\cdot\text{mol}^{-1}$ | Year <sup>(Reference)</sup>            |
|------------------------------------------------------|-------------------------------------------------------|------------------------------------------------------|----------------------------------------|
| 30490.47±7.13 (7)                                    | 2504.62±1.50                                          | 73.09±1.59                                           | 1999 <sup>(3,4)</sup>                  |
| 30453.60±4.02 (5)                                    | 2501.60±1.42                                          | 70.07±1.52                                           | 2011 Rostock laboratory <sup>(5)</sup> |
| 30491.27±9.29 (5)                                    | 2504.69±2.66                                          | 73.16±2.71                                           | 2011 Minsk laboratory <sup>(5)</sup>   |

<sup>a</sup> The number of determinations is given in parenthesis

**(b) Enthalpy of vaporisation of 1-methylimidazole.** The standard specific enthalpy of vaporisation of mim,  $\Delta_{\text{vap}}h^{\circ}$ , at 298.15 K, was obtained from two series of drop-vaporisation Calvet microcalorimetry experiments, separated by one year. Different samples (samples 1 and 2) were used in each series of runs. The  $\Delta_{\text{vap}}h^{\circ}$  values were derived as described in Section 1 for [Hmim][O<sub>2</sub>CCH<sub>3</sub>] and the obtained results are summarized in Tables S9-S10.

**TABLE S9: Results of the vaporisation enthalpy measurements on 1-methylimidazole (Sample A), by drop-vaporisation Calvet microcalorimetry**

| <i>T</i> /K | <i>m<sub>s</sub></i> /mg | <i>m<sub>H<sub>2</sub>O</sub></i> /μg | <i>m</i> /mg | <i>A</i> | $\Delta_{\text{vap}}h^{\circ}$ /J·g <sup>-1</sup> |
|-------------|--------------------------|---------------------------------------|--------------|----------|---------------------------------------------------|
| 298.28      | 15.19                    | 0.3                                   | 15.19        | 650.146  | 666.373                                           |
| 298.30      | 11.48                    | 0.2                                   | 11.48        | 507.129  | 685.988                                           |
| 298.31      | 18.38                    | 0.4                                   | 18.38        | 797.799  | 677.001                                           |
| 298.30      | 13.48                    | 0.3                                   | 13.48        | 572.769  | 660.697                                           |
| 298.29      | 11.52                    | 0.2                                   | 11.52        | 496.832  | 669.630                                           |
| 298.29      | 11.21                    | 0.2                                   | 11.21        | 489.517  | 677.889                                           |
| 298.29      | 17.04                    | 0.3                                   | 17.04        | 749.477  | 685.634                                           |

Water content from Karl Fisher titration: 20 ppm

$$\langle \Delta_{\text{vap}}h^{\circ} \rangle = 674.74 \pm 3.63 \text{ J} \cdot \text{g}^{-1}$$

$$\langle \varepsilon \rangle = 63.626 \pm 0.069 \text{ mV} \cdot \text{W}^{-1}$$

$$A_{\text{b}} = 6.044 \text{ mV} \cdot \text{s}$$

$$\sigma(\text{over-all}) = 3.70 \text{ J} \cdot \text{g}^{-1}$$

$$\Delta_{\text{vap}}H_{\text{m}}^{\circ} = 55.40 \pm 0.61 \text{ kJ} \cdot \text{mol}^{-1}$$



**TABLE S10: Results of the vaporisation enthalpy measurements on 1-methylimidazole (Sample B), by drop-vaporisation Calvet microcalorimetry**

| $T/K$  | $m_s/mg$ | $m_{H_2O}/\mu g$ | $m/mg$ | $A$     | $\Delta_{vap}h^\circ / J \cdot g^{-1}$ |
|--------|----------|------------------|--------|---------|----------------------------------------|
| 297.89 | 6.33     | 0.1              | 6.33   | 268.707 | 655.766                                |
| 297.89 | 6.83     | 0.1              | 6.83   | 290.446 | 657.687                                |
| 297.89 | 10.59    | 0.1              | 10.59  | 447.634 | 656.752                                |
| 297.88 | 7.79     | 0.1              | 7.79   | 342.231 | 680.745                                |
| 297.89 | 10.01    | 0.1              | 10.01  | 424.620 | 658.841                                |
| 297.89 | 8.36     | 0.1              | 8.36   | 356.170 | 660.526                                |
| 297.90 | 11.70    | 0.1              | 11.70  | 502.797 | 668.376                                |
| 297.90 | 12.82    | 0.2              | 12.82  | 543.617 | 659.906                                |

Water content from Karl Fisher titration: 12 ppm

$$\langle \Delta_{vap}h^\circ \rangle = 662.32 \pm 2.97 \text{ J} \cdot g^{-1}$$

$$\langle \varepsilon \rangle = 63.805 \pm 0.138 \text{ mV} \cdot W^{-1}$$

$$A_b = 3.850 \text{ mV} \cdot s$$

$$\sigma(\text{over-all}) = 3.30 \text{ J} \cdot g^{-1}$$

$$\Delta_{vap}H_m^\circ = 54.38 \pm 0.54 \text{ kJ} \cdot \text{mol}^{-1}$$

## References

1. J. D. Cox, D. D. Wagman and V. A. Medvedev, *Codata Key Values for Thermodynamics*, Hemisphere, New York, 1989.
2. D. D. Wagman, W. H. Evans, V. B. Parker, R. H. Schumm, I. Halow, S. M. Bailey, K. L. Churney and R. L. Nuttall, in *J. Phys Chem. Ref. Data*, 1982, pp. 11, Supplement no. 12.
3. O. M6, M. Y6ñez, M. V. Roux, P. Jim6nez, J. Z. D6valos, M. A. V. Ribeiro da Silva, M. D. M. C. Ribeiro da Silva, M. A. R. Matos, L. M. P. F. Amaral, A. S6nchez-Migall6n, P. Cabildo, R. Claramunt, J. Elguero and J. F. Liebman, *J. Phys. Chem. A*, 1999, **103**, 9336-9344.
4. M. D. M. C. Ribeiro da Silva, *Personal communication*.
5. S. P. Verevkin, D. H. Zaitsau, V. N. Emel'yanenko, Y. U. Paulechka, A. V. Blokhin, A. B. Bazyleva and G. J. Kabo, *J. Phys. Chem. B*, 2011, **115**, 4404-4411.
6. L. Bjellerup, *Acta Chem. Scand.*, 1961, **15**, 121-140.
7. G. Olofsson, in *Experimental Chemical Thermodynamics*, eds. S. Sunner and M. M6nsson, Pergamon Press, Oxford, 1979, vol. 1, pp. 137-159.
8. J. A. Martinho Sim6es and M. E. Minas da Piedade, *Molecular Energetics*, Oxford University Press, New York, 2008.
